# Supplementary material for: SNARE Protein AoSec22 Orchestrates Mycelial Growth, Vacuole Assembly, Trap Formation, Stress Response, and Secondary Metabolism in Arthrobotrys oligospora
Source: MDPI journal article supplement (doi:10.3390/jof9010075), 2023-01-04
Supplement: s1 [file s1]

Supporting Information

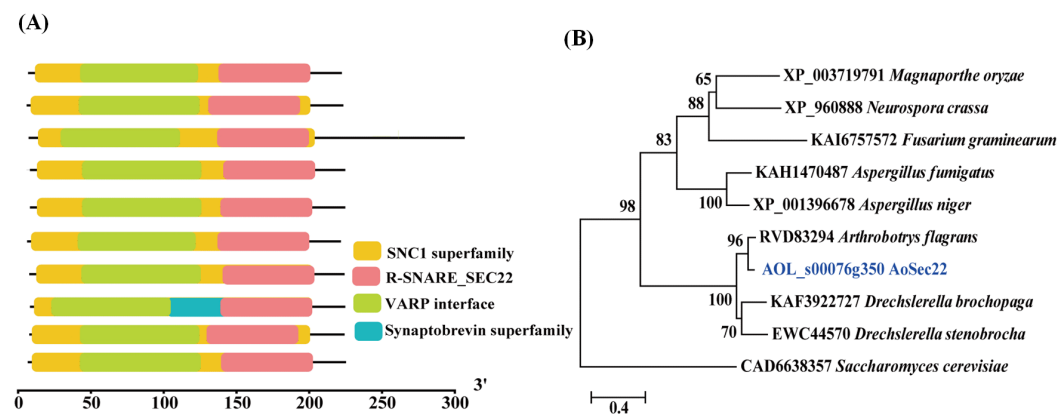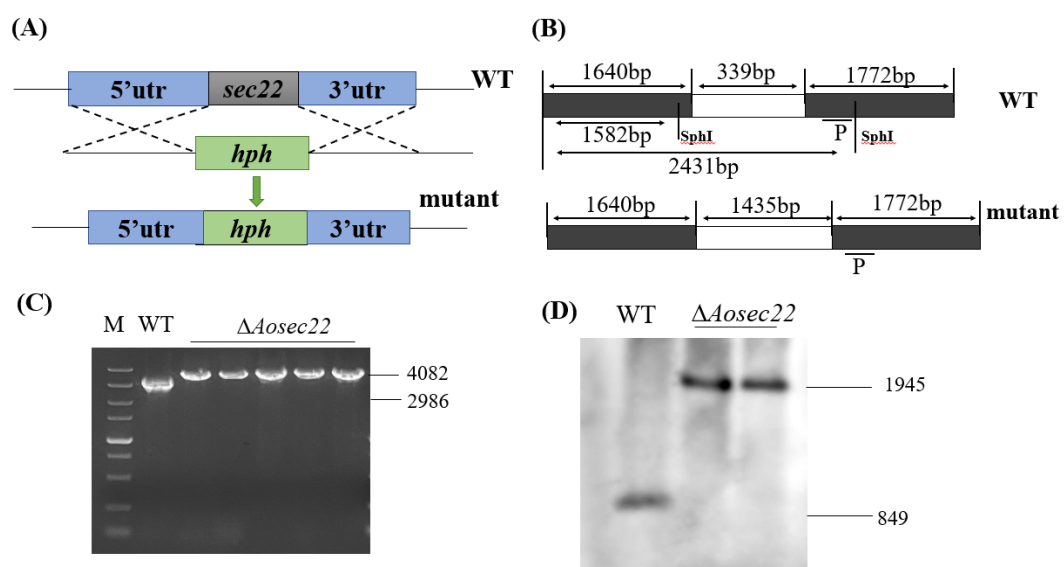

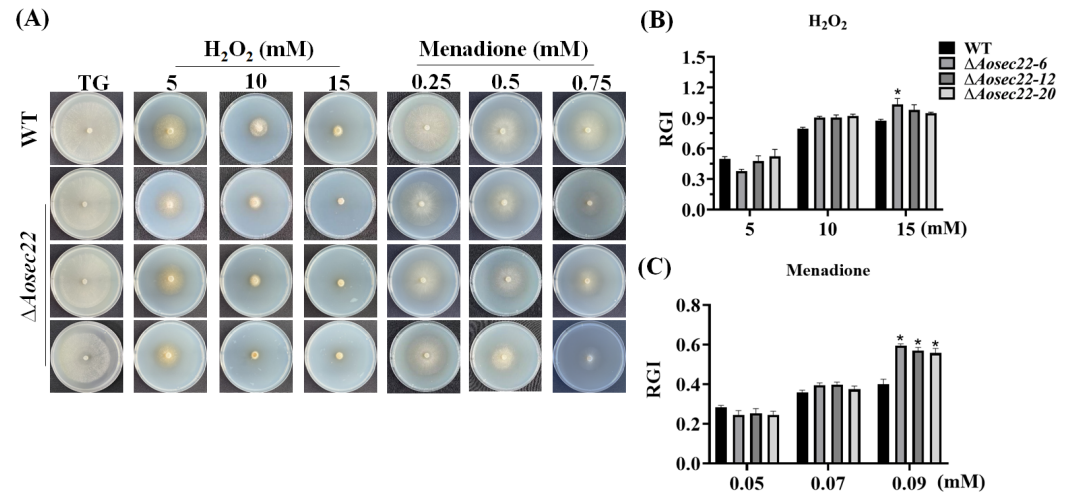

**Figure S3.** Comparison of oxidative stress responses between WT and  $\Delta Aosec22$  mutant strains. (A) Colonial morphology of fungal strains under oxidative stress. (B) Relative growth inhibition (RGI) of fungal colonies after being grown for 6 days at 28 °C on TG plates supplemented with different concentrations of H<sub>2</sub>O<sub>2</sub> and menadione. An asterisk indicates a significant difference between  $\Delta Aosec22$  mutant and the WT strain (Tukey's HSD,  $p < 0.05$ ).

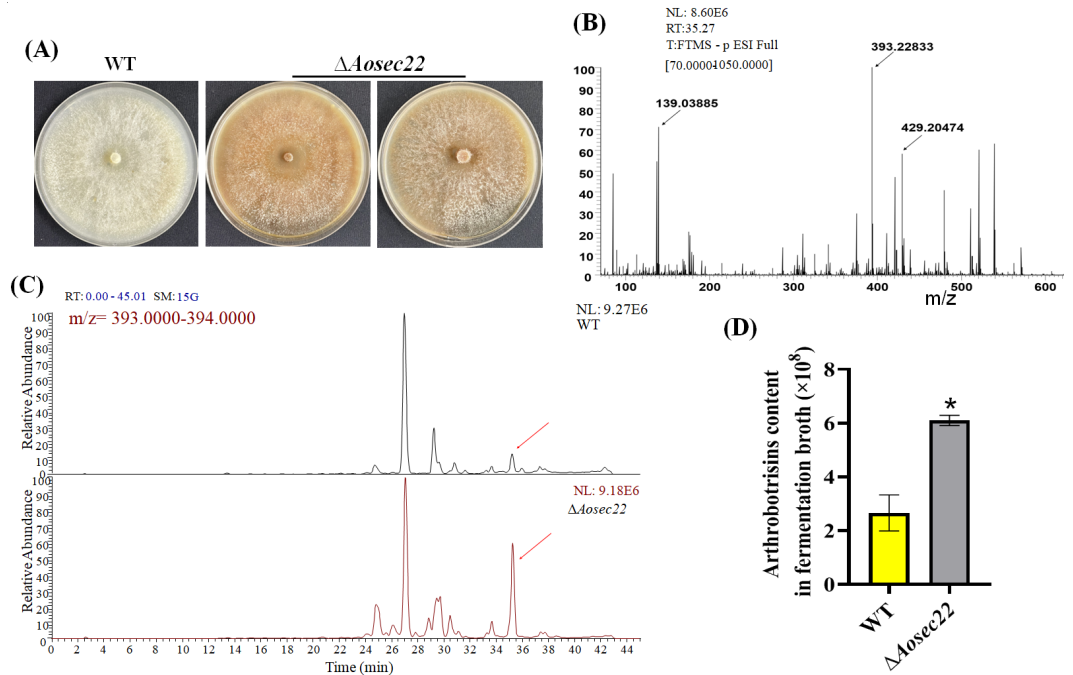

**Figure S4.** Comparison of the color of colony and the content of arthrobotrisins. (A) The WT and mutant were incubated on PDA medium for 10 days. (B) Mass spectrogram of arthrobotrisins in the WT strain (diagnostic fragments ion at m/z 139, 393, and 429). (C) Mass spectrogram of arthrobotrisins in the WT and  $\Delta Aosec22$  strains (diagnostic fragments ion at m/z 393.0000-394.0000). RT = 35.12 min. (D) The quantification data for arthrobotrisins.

**Table S1.** List of primers used for gene manipulation in this study.

|               |                                                 |                            |
|---------------|-------------------------------------------------|----------------------------|
| AoSec22-5F    | GTAACGCCAGGGTTTTCCAGTCACGACGACTCCTGCTGATTGTCCT  | Amplify the <i>AoSec22</i> |
| AoSec22-5R    | ATCCACTTAACGTTACTGAAATCTCCAACCTTTGTACTGCTGGAGAT | gene 5' flank              |
| AoSec22-3F    | CTCCTTCAATATCATCTTCTGTCTCCGACCAAGGGTTATGACGAAGA | Amplify the <i>AoSec22</i> |
| AoSec22-3R    | GCGGATAACAATTCACACAGGAAACAGCTCCGAAGTTTGCGTGTCT  | gene 3' flank              |
| Hph-f         | GTCGGAGACAGAAGATGATATTGAAGGAGC                  | Amplify the <i>hph</i>     |
| Hph-r         | GTTGGAGATTTCAGTAACGTTAAGTGGAT                   | cassette                   |
| YZ-Sec22-F    | GCACTCCAGACACCACCT                              | Verify the                 |
| YZ-Sec22-R    | CAGCCACATAACCGTCCC                              | transformants              |
| Probe-Sec22-F | CAAGGGTTATGACGAAGA                              | Make Southern              |
| Probe-Sec22-R | CTGAGTCAGATCCGTTCC                              | blotting probe             |

**Table S2.** Paired primers for RT-qPCR analysis of genes associated with phenotypes such as conidiation and fatty acid oxidation in *A. oligospora*.

| Description                           | Gene name                      | Sequence (5'-3')                                               |
|---------------------------------------|--------------------------------|----------------------------------------------------------------|
| Sporulation-related genes             | AOL_s00007g157 ( <i>flbC</i> ) | flbC-5F-CTCTCCGGCAAAGACAATCG<br>flbC-3R-GTCGACTGAGGATAGTAGCT   |
|                                       | AOL_s00043g361 ( <i>fluG</i> ) | fluG-5F-GATTCCAGTCCCGTGAATTC<br>fluG-3R-GCTAAGGAGAGGATGGGCAT   |
|                                       | AOL_s00080g63 ( <i>abaA</i> )  | abaA-5F-AACTTTATGCGCCTTGTCGT<br>abaA-3R-TTGGCTAGGTGGTCTGTACG   |
|                                       | AOL_s00054g811 ( <i>velB</i> ) | velB-5F-ATTCGCAACTTCTCCCTCA<br>velB-3R-GGCATGTTTGGATTCTGGGG    |
|                                       | AOL_s00097g514 ( <i>brlA</i> ) | brlA-5F-AACTCCATCACCATCCGTAA<br>brlA-5R-CAGGATATTCGGCACTCA     |
|                                       | AOL_s00173g221 ( <i>wetA</i> ) | wetA-5F-CCCTGTGCTACTATTGTAC<br>wetA-5R-CCGTTGCGAGCATTCTT       |
|                                       |                                |                                                                |
| β-tubulin gene                        | AOL_s00076g640 ( <i>tub</i> )  | tubA-F-CCACCTTCGTCGGTAACTC<br>tubA-R-TCGTCCATACCCTCACCAG       |
| Genes related to fatty acid oxidation | AOL_s00004g288                 | 288-5F-AAGAAATCCCACTTCAGAGAGG<br>288-3R-TACGTGTCCAGTAACATAGCTC |
|                                       | AOL_s00081g51                  | 51-5F-GCCGATCCTTACCAAATCATTC<br>51-3R-CCAATTCTTTCCGTAGCTGAG    |
|                                       | AOL_s00210g122                 | 122-5F-GCCGCACATATTGTTAACAGAT<br>122-3R-TGATCTTGCTGTCTCAGTCAT  |
|                                       | AOL_s00110g113                 | 113-5F-CTAACAGAACTCAAGCATCGG<br>113-3R-GGAACCGGATTCATGAAATGAG  |
|                                       | AOL_s00079g276                 | 276-5F-AACAATCCGTCGTTATTGTTC<br>276-3R-GCGATCATGTAGTCTAGTCCTC  |
|                                       | AOL_s00054g29                  | 29-5F-GGTATCTACGAAATTTTGCC<br>29-3R-GTGCAATATAATCGGGCTTGAG     |
|                                       | AOL_s00004g606                 | 606-5F-TTCGGATTGTTATTACCTCCC<br>606-3R-TAACATGAGTCGCTTGTGTTG   |
|                                       |                                |                                                                |
